# Supplementary material for: PON1 Deficiency Promotes TREM2 Pathway-Mediated Microglial Phagocytosis and Inhibits Pro-Inflammatory Cytokines Release in Vitro and in Vivo
Source: Research Square preprint supplement (doi:10.21203/rs.3.rs-673247/v2), 2021-08-23
Supplement: Supplementary file 2 [file 75fdea8e0b75a9338ed360c8.docx]

**Table s1.** Antibodies used in this study

| Antibodies | Catalog | Source | Application | |
| --- | --- | --- | --- | --- |
| Anti-PON1 [EPR2893] | ab126597 | Abcam | | WB IP |
| Anti-PON1 [17A12] | ab24261 | Abcam | | WB IF |
| Anti-MAP2 | ab32454 | Abcam | | IF |
| Anti-GFAP | ab7260 | Abcam | | IF |
| Anti-Iba1 [EPR16589] | ab178847 | Abcam | | IF |
| Anti-CD11b/c [OX42] | ab1211 | Abcam | | IF |
| Anti- iNOS | ab15323 | Abcam | | WB IF |
| Phospho-p44/42 MAPK (Erk1/2) (Thr202/Tyr204) (D13.14.4E) XP® Rabbit mAb | 4370s | CST | | WB |
| p44/42 MAPK (Erk1/2) | 9102s | CST | | WB |
| Anti-GAPDH [mAbcam 9484] – Loading Control (HRP) | ab9482 | Abcam | | WB |
| Anti-TREM2 [MM0942-42E14] | ab201621 | Abcam | | WB IP |
| Phospho-Syk (Tyr525/526) (C87C1)  Rabbit mAb | 2710S | CST | | WB |
| Syk (D3Z1E) XP® Rabbit mAb | 13198s | CST | | WB |
| Vav2 (C64H2) Rabbit mAb | 2848s | CST | | WB |
| Vav3 antibody | 2398s | CST | | WB |
| ARP2 (D85D5) Rabbit mAb | 5614s | CST | | WB |
| Arp3 | 4738s | CST | | WB |
| DAP12 (D7G1X) Rabbit mAb | 12492s | CST | | WB |
| TREM2 (D8I4C) Rabbit mAb | 91068 | CST | | IF |
| LAMP1 (D4O1S) Mouse mAb | 15665 | CST | | IF |
| Myc-Tag (71D10) Rabbit mAb | 2278 | CST | | WB |
| DYKDDDDK Tag (D6W5B) Rabbit mAb | 14793 | CST | | WB |
| Anti-Apolipoprotein E [EPR19392] | ab183597 | Abcam | | WB |
| Phospho-Pyk2 (Tyr402) | 3291s | CST | | WB |
| Pyk2 | 3292s | CST | | WB |
| Anti-TLR4 [76B357.1] | ab22048 | Abcam | | WB |
| NF-κB p65 (C22B4) Rabbit mAb | 4764 | CST | | WB |
| IκBα (L35A5) Mouse mAb  (amino-terminal antigen) | 4814 | CST | | WB |
| Anti-Nucleolin | ab22758 | Abcam | | WB |

**Table s2.** RT-PCR primer of rat cytokines

| Genes and primer name | RT-PCR primer sequence |
| --- | --- |
| rGAPDH-F | CTCATGACCACAGTCCATGC |
| rGAPDH-R | TTCAGCTCTGGGATGACCTT |
| rIL1β-F | CTGTGACTCGTGGGATGATG |
| rIL1β-R | GGGATTTTGTCGTTGCTTGT |
| rIL6-F | CCGGAGAGGAGACTTCACAG |
| rIL6-R | ACAGTGCATCATCGCTGTTC |
| rTNFα-F | AGATGTGGAACTGGCAGAGG |
| rTNFα-R | CCCATTTGGGAACTTCTCCT |
| riNOS-F | AGGGAGTGTTGTTCCAGGTG |
| riNOS-R | TCCTCAACCTGCTCCTCACT |
| rIL10-F | CCTGCTCTTACTGGCTGGAG |
| rIL10-R | TGTCCAGCTGGTCCTTCTTT |
| rArg1-F | TATCGGAGCGCCTTTCTCTA |
| rArg1-R | ACAGACCGTGGGTTCTTCAC |
| rMrc1-F | CAAGGAAGGTTGGCATTTGT |
| rMrc1-R | CAAAGGAACGTGTGCTCTGA |
